# Supplementary material for: High-surface-area plasmonic MoO3−x: rational synthesis and enhanced ammonia borane dehydrogenation activity
Source: Royal Society of Chemistry journal article supplement (doi:10.1039/c7ta01217a), 2017-01-01
Supplement: c7ta01217a1.pdf [file c7ta01217a1.pdf]

## Supporting information

### **High-surface-area plasmonic MoO<sub>3-x</sub>: rational synthesis and enhanced ammonia borane dehydrogenation activity**

Haibo Yin,<sup>a</sup> Yasutaka Kuwahara,<sup>a,b</sup> Kohsuke Mori,<sup>a,b,c</sup> Hefeng Cheng,<sup>a</sup>

Meicheng Wen<sup>a</sup> and Hiromi Yamashita<sup>a,b,\*</sup>

<sup>a</sup>*Graduate School of Engineering, Osaka University, Osaka, 565-0871, Japan*

<sup>b</sup>*Unit of Elements Strategy Initiative for Catalyst & Batteries (ESICB),*

*Kyoto University, Kyoto, 615-8245, Japan*

<sup>c</sup>*JST, PRESTO, 4-1-8 HonCho, Kawaguchi, Saitama, 332-0012, Japan*

*\*Corresponding Author: E-mail: yamashita@mat.eng.osaka-u.ac.jp*

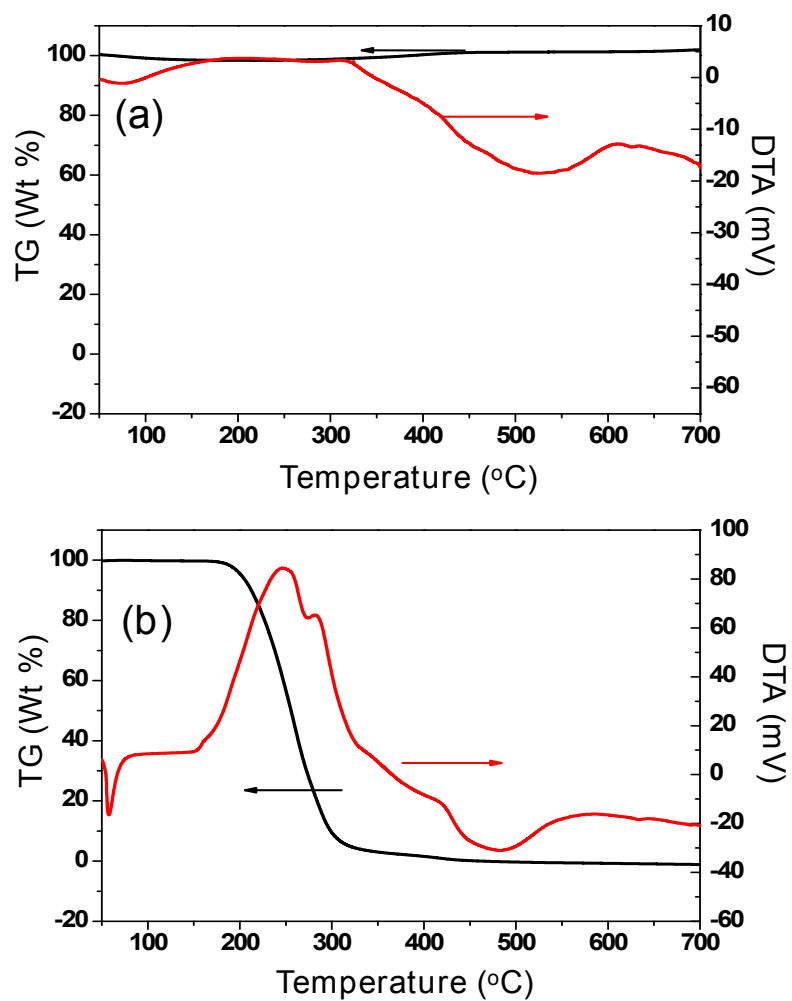

**Figure S1.** TG/DTA curves of  $\text{MoO}_{3-x}-200\text{ }^\circ\text{C}$  (a) and F 127 (b) recorded in air.

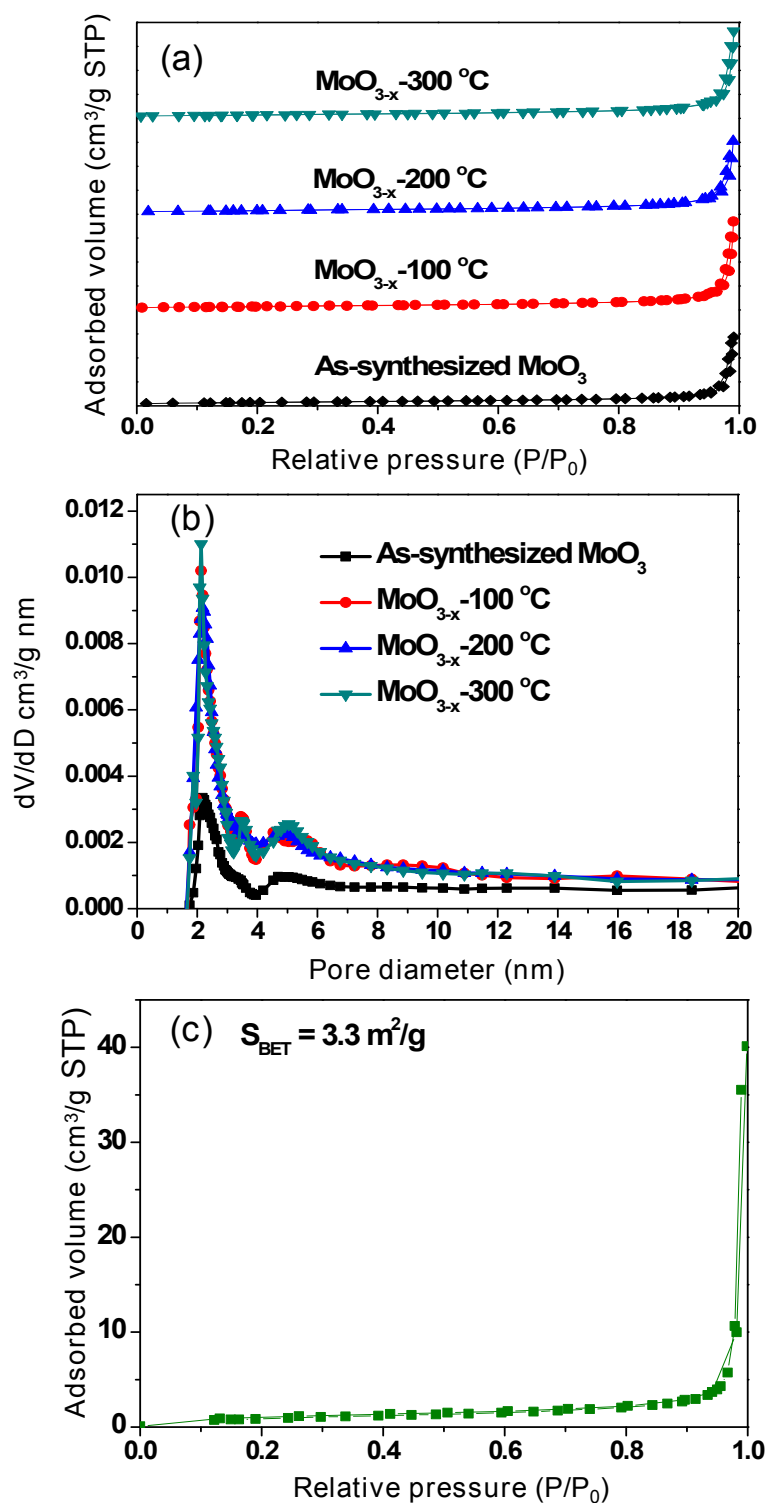

**Figure S2.** (a) N<sub>2</sub> adsorption-desorption isotherms, (b) the corresponding BJH pore size distribution curves of as-synthesized MoO<sub>3</sub> and MoO<sub>3-x</sub>-T samples hydrogen-treated at different temperatures and (c) N<sub>2</sub> adsorption-desorption isotherms of MoO<sub>3-x</sub> nanosheets (Route 1).

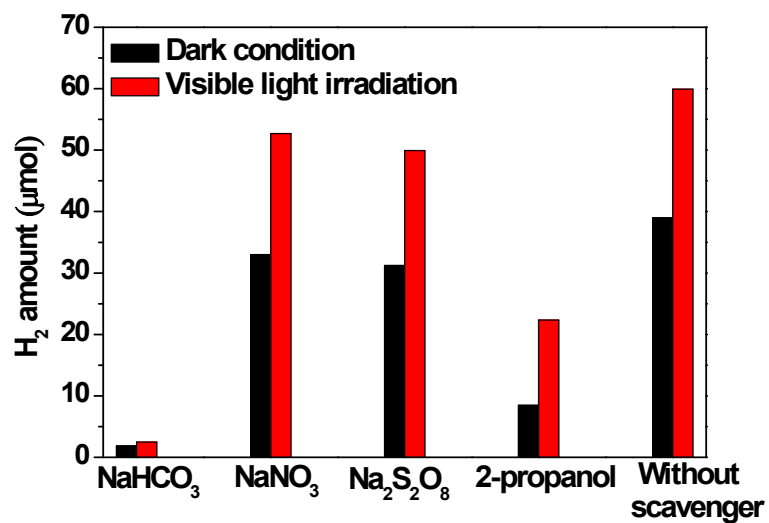

**Figure S3.** The comparison of H<sub>2</sub> production activity from AB solution with or without NaHCO<sub>3</sub> (100 μmol) as positive charge scavenger, 2-propanol (100 μmol) as .OH scavenger, NaNO<sub>3</sub> (100 μmol) and Na<sub>2</sub>S<sub>2</sub>O<sub>8</sub> (100 μmol) as negative charge scavenger over plasmonic MoO<sub>3-x</sub>-200 °C sample.
